# Supplementary material
Source: MDPI journal article supplement (https://www.mdpi.com/2227-7102/13/2/121)
Supplement: s1 [file s1]

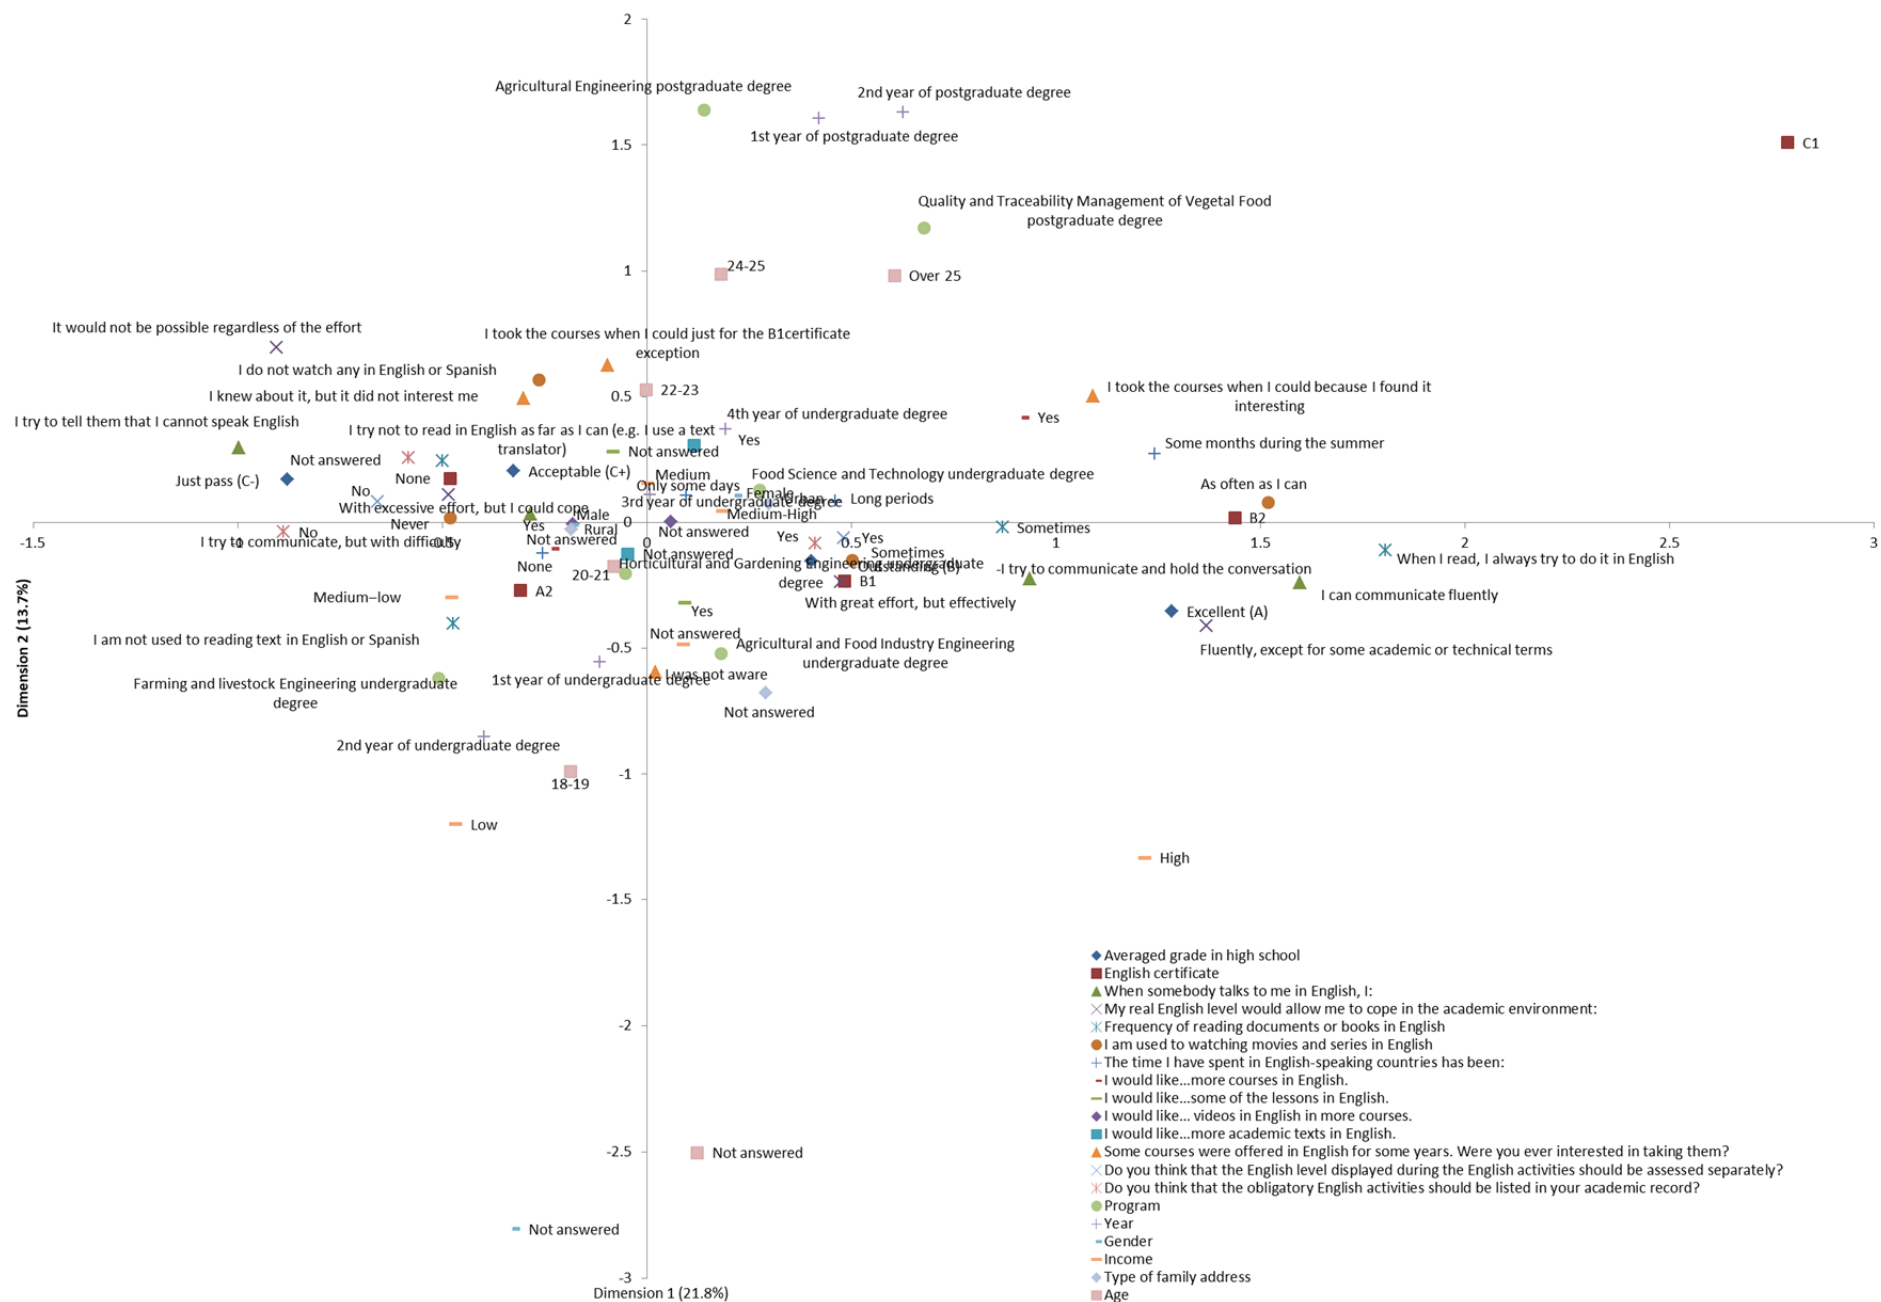

**Figure S1.** Joint category plot of the centroid coordinates of each variable included in the multiple correspondence analysis showing category quantifications and contributions.
